# Supplementary material for: Diet Diversity in Carnivorous Terebrid Snails Is Tied to the Presence and Absence of a Venom Gland
Source: PubMed Central journal article supplement (PMC7912948; doi:10.3390/toxins13020108), 2021-02-02
Supplement: toxins-13-00108-s001.pdf [file toxins-13-00108-s001.pdf]

# Supplementary Materials: Diet Diversity in the Carnivorous Terebrid Snails is Tied to the Presence and Absence of a Venom Gland

Juliette Gorson, Giulia Fassio, Emily S. Lau and Mandë Holford

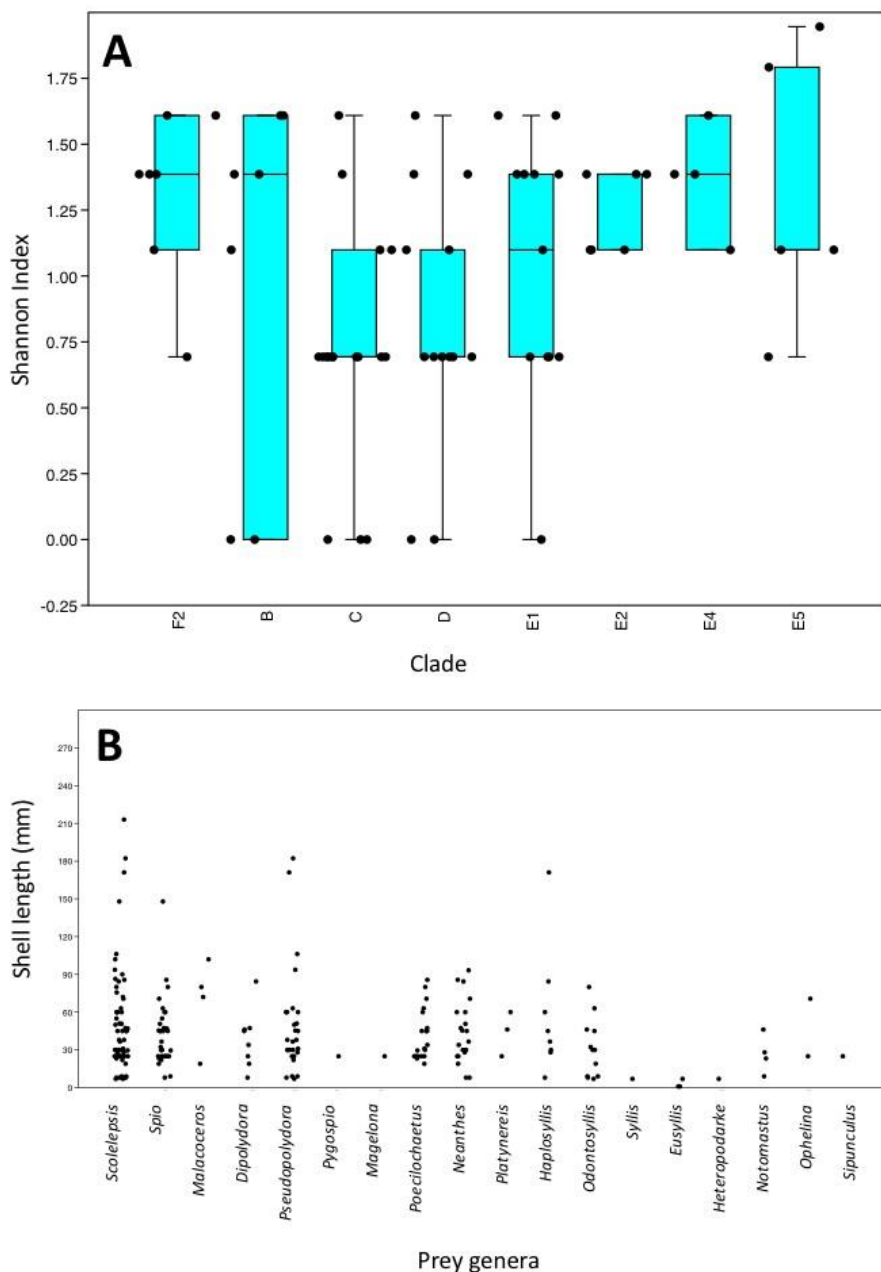

**Figure S1.** Correlation of terebrid diet and phylogenetic clade (A) and shell length (B). There is no statistical correlation between diet breadth and phylogenetic clade, but we do see that clades C, D, and E2 have the lowest gut diversity, while clade B has the highest gut diversity. Similarly, we do not see a statistical correlation between shell length and genera of prey consumed, but our data is biased because the majority of samples being analyzed are <90 mm.

**Table S1.** Terebridae vouchers number, foregut type, venom apparatus type, phylogenetic clade, shell length, collection locality, and prey genera found in each specimen (0=absence, 1=presence.).

| Voucher # | Species               | Foregut type | Venom apparatus type | Phylogeny Clade | Shell length (mm) | Collection Locality       | Total n of prey types | Spionidae | Spionidae | Spionidae | Spionidae | Spionidae | Spionidae   | Magelonidae      | Poecilochaetidae | Nereididae | Nereididae | Syllidae | Syllidae | Syllidae | Syllidae   | Hesionidae             | Opheliidae/Caprellidae | Travisiidae/Opheliidae | Sipunculidae |
|-----------|-----------------------|--------------|----------------------|-----------------|-------------------|---------------------------|-----------------------|-----------|-----------|-----------|-----------|-----------|-------------|------------------|------------------|------------|------------|----------|----------|----------|------------|------------------------|------------------------|------------------------|--------------|
|           |                       |              |                      |                 |                   |                           |                       | Spionidae | Spionidae | Spionidae | Spionidae | Spionidae | Magelonidae | Poecilochaetidae | Nereididae       | Nereididae | Syllidae   | Syllidae | Syllidae | Syllidae | Hesionidae | Opheliidae/Caprellidae | Travisiidae/Opheliidae | Sipunculidae           |              |
| KVG_236   | <i>Hastula acumen</i> | 2            | 1                    | D               | 25                | Kavieng, Papua New Guinea | 4                     | 1         | 1         | 0         | 1         | 0         | 0           | 0                | 0                | 0          | 1          | 0        | 0        | 0        | 0          | 0                      | 0                      | 0                      | 0            |
| KVG_243   | <i>Hastula acumen</i> | 2            | 1                    | D               | 28                | Kavieng, Papua New Guinea | 2                     | 1         | 0         | 0         | 0         | 1         | 0           | 0                | 0                | 0          | 0          | 0        | 0        | 0        | 0          | 0                      | 0                      | 0                      | 0            |
| KVG_201   | <i>Hastula acumen</i> | 2            | 1                    | D               | 30                | Kavieng, Papua New Guinea | 3                     | 1         | 0         | 0         | 0         | 1         | 0           | 0                | 0                | 0          | 0          | 0        | 1        | 0        | 0          | 0                      | 0                      | 0                      | 0            |

|         |                         |   |   |    |        |                           |   |   |   |   |   |   |   |   |   |   |   |   |   |   |   |   |   |   |
|---------|-------------------------|---|---|----|--------|---------------------------|---|---|---|---|---|---|---|---|---|---|---|---|---|---|---|---|---|---|
|         |                         |   |   |    |        | Guinea                    |   |   |   |   |   |   |   |   |   |   |   |   |   |   |   |   |   |   |
| KVG_203 | <i>Hastula acumen</i>   | 2 | 1 | D  | 30     | Kavieng, Papua New Guinea | 4 | 1 | 1 | 0 | 0 | 1 | 0 | 0 | 0 | 0 | 0 | 0 | 1 | 0 | 0 | 0 | 0 | 0 |
| KVG_242 | <i>Hastula acumen</i>   | 2 | 1 | D  | 75.639 | Kavieng, Papua New Guinea | 1 | 1 | 0 | 0 | 0 | 0 | 0 | 0 | 0 | 0 | 0 | 0 | 0 | 0 | 0 | 0 | 0 | 0 |
| KVG_198 | <i>Hastula acumen</i>   | 2 | 1 | D  | 30     | Kavieng, Papua New Guinea | 3 | 1 | 0 | 0 | 0 | 1 | 0 | 0 | 0 | 1 | 0 | 0 | 0 | 0 | 0 | 0 | 0 | 0 |
| KVG_103 | <i>Myurella affinis</i> | 3 | 0 | E1 | 31     | Kavieng, Papua New Guinea | 3 | 1 | 0 | 0 | 0 | 1 | 0 | 0 | 1 | 0 | 0 | 0 | 0 | 0 | 0 | 0 | 0 | 0 |
| KVG_215 | <i>Myurella affinis</i> | 3 | 0 | E1 | 38     | Kavieng, Papua New Guinea | 2 | 1 | 0 | 0 | 0 | 1 | 0 | 0 | 0 | 0 | 0 | 0 | 0 | 0 | 0 | 0 | 0 | 0 |
| KVG_214 | <i>Myurella affinis</i> | 3 | 0 | E1 | 46.209 | Kavieng, Papua New Guinea | 4 | 0 | 0 | 0 | 1 | 0 | 0 | 0 | 0 | 1 | 0 | 1 | 0 | 0 | 0 | 1 | 0 | 0 |
| KVG_90  | <i>Myurella affinis</i> | 3 | 0 | E1 | 93.688 | Kavieng, Papua New Guinea | 2 | 1 | 0 | 0 | 0 | 1 | 0 | 0 | 0 | 0 | 0 | 0 | 0 | 0 | 0 | 0 | 0 | 0 |
| KVG_97  | <i>Myurella affinis</i> | 3 | 0 | E1 | 28.071 | Kavieng, Papua New Guinea | 4 | 1 | 0 | 0 | 0 | 0 | 0 | 0 | 1 | 0 | 1 | 0 | 0 | 0 | 0 | 1 | 0 | 0 |
| KVG_234 | <i>Hastula albula</i>   | 2 | 1 | D  | 25     | Kavieng, Papua New Guinea | 2 | 0 | 0 | 0 | 0 | 1 | 0 | 0 | 0 | 0 | 0 | 0 | 0 | 0 | 0 | 0 | 1 | 0 |
| KVG_53  | <i>Myurella amoena</i>  | 3 | 0 | E1 | 23.21  | Kavieng, Papua New Guinea | 4 | 1 | 1 | 0 | 0 | 0 | 0 | 1 | 0 | 0 | 0 | 0 | 0 | 0 | 0 | 1 | 0 | 0 |
| KVG_159 | <i>Myurella amoena</i>  | 3 | 0 | E1 | 36.6   | Kavieng,                  | 5 | 1 | 1 | 0 | 0 | 1 | 0 | 0 | 0 | 1 | 0 | 1 | 0 | 0 | 0 | 0 | 0 | 0 |

|         |                             |   |   |    |         |                           |   |   |   |   |   |   |   |   |   |   |   |   |   |   |   |   |   |   |   |
|---------|-----------------------------|---|---|----|---------|---------------------------|---|---|---|---|---|---|---|---|---|---|---|---|---|---|---|---|---|---|---|
|         |                             |   |   |    |         | Papua New Guinea          |   |   |   |   |   |   |   |   |   |   |   |   |   |   |   |   |   |   |   |
| KVG_2   | <i>Myurella amoena</i>      | 3 | 0 | E1 | 70.676  | Kavieng, Papua New Guinea | 5 | 1 | 1 | 0 | 0 | 0 | 0 | 0 | 1 | 1 | 0 | 0 | 0 | 0 | 0 | 0 | 0 | 1 | 0 |
| KVG_247 | <i>Oxymeris areolata</i>    | 1 | 0 | B  | 86.424  | Kavieng, Papua New Guinea | 1 | 1 | 0 | 0 | 0 | 0 | 0 | 0 | 0 | 0 | 0 | 0 | 0 | 0 | 0 | 0 | 0 | 0 | 0 |
| KVG_41  | <i>Oxymeris areolata</i>    | 1 | 0 | B  | 213.001 | Kavieng, Papua New Guinea | 1 | 1 | 0 | 0 | 0 | 0 | 0 | 0 | 0 | 0 | 0 | 0 | 0 | 0 | 0 | 0 | 0 | 0 | 0 |
| KVG_190 | <i>Oxymeris areolata</i>    | 1 | 0 | B  | 34      | Kavieng, Papua New Guinea | 3 | 0 | 0 | 0 | 1 | 0 | 0 | 0 | 1 | 1 | 0 | 0 | 0 | 0 | 0 | 0 | 0 | 0 | 0 |
| KVG_265 | <i>Terebra argus</i>        | 2 | 1 | C  | 51      | Kavieng, Papua New Guinea | 2 | 1 | 0 | 0 | 0 | 1 | 0 | 0 | 0 | 0 | 0 | 0 | 0 | 0 | 0 | 0 | 0 | 0 | 0 |
| KVG_129 | <i>Terebra argus</i>        | 2 | 1 | C  | 147.93  | Kavieng, Papua New Guinea | 2 | 1 | 1 | 0 | 0 | 0 | 0 | 0 | 0 | 0 | 0 | 0 | 0 | 0 | 0 | 0 | 0 | 0 | 0 |
| KVG_XX  | <i>Terebra argus</i>        | 2 | 1 | C  | ?       | Kavieng, Papua New Guinea | 4 | 1 | 1 | 0 | 0 | 1 | 0 | 0 | 1 | 0 | 0 | 0 | 0 | 0 | 0 | 0 | 0 | 0 | 0 |
| KVG_84  | <i>Terebra argus</i>        | 2 | 1 | C  | 47.376  | Kavieng, Papua New Guinea | 5 | 1 | 1 | 0 | 1 | 0 | 0 | 0 | 1 | 1 | 0 | 0 | 0 | 0 | 0 | 0 | 0 | 0 | 0 |
| Tamp_17 | <i>Neoterebra dislocata</i> | 3 | 0 | E4 | 45      | Tampa, Florida, USA       | 3 | 1 | 1 | 0 | 0 | 0 | 0 | 0 | 1 | 0 | 0 | 0 | 0 | 0 | 0 | 0 | 0 | 0 | 0 |
| Tamp_18 | <i>Neoterebra dislocata</i> | 3 | 0 | E4 | 45      | Tampa, Florida, USA       | 4 | 1 | 1 | 0 | 1 | 0 | 0 | 0 | 0 | 0 | 0 | 1 | 0 | 0 | 0 | 0 | 0 | 0 | 0 |
| Tamp_63 | <i>Neoterebra dislocata</i> | 3 | 0 | E4 | 45      | Tampa, Florida, USA       | 4 | 1 | 1 | 0 | 0 | 0 | 0 | 0 | 1 | 0 | 0 | 0 | 1 | 0 | 0 | 0 | 0 | 0 | 0 |
| Tamp_50 | <i>Neoterebra dislocata</i> | 3 | 0 | E4 | 45      | Tampa, Florida, USA       | 5 | 1 | 1 | 0 | 0 | 1 | 0 | 0 | 1 | 1 | 0 | 0 | 0 | 0 | 0 | 0 | 0 | 0 | 0 |

| USA     |                        |   |   |   |         |                           |   |   |   |   |   |   |   |   |   |   |   |   |   |   |   |   |   |   |   |
|---------|------------------------|---|---|---|---------|---------------------------|---|---|---|---|---|---|---|---|---|---|---|---|---|---|---|---|---|---|---|
| KVG_113 | <i>Oxymeris felina</i> | 1 | 0 | B | 63.051  | Kavieng, Papua New Guinea | 5 | 1 | 1 | 0 | 0 | 1 | 0 | 0 | 1 | 0 | 0 | 0 | 1 | 0 | 0 | 0 | 0 | 0 | 0 |
| KVG_211 | <i>Oxymeris felina</i> | 1 | 0 | B | 80      | Kavieng, Papua New Guinea | 5 | 1 | 1 | 1 | 0 | 0 | 0 | 0 | 1 | 0 | 0 | 0 | 1 | 0 | 0 | 0 | 0 | 0 | 0 |
| KVG_112 | <i>Oxymeris felina</i> | 1 | 0 | B | 29.587  | Kavieng, Papua New Guinea | 4 | 1 | 1 | 0 | 0 | 0 | 0 | 0 | 1 | 1 | 0 | 0 | 0 | 0 | 0 | 0 | 0 | 0 | 0 |
| KVG_114 | <i>Oxymeris felina</i> | 1 | 0 | B | 85.667  | Kavieng, Papua New Guinea | 4 | 1 | 1 | 0 | 0 | 0 | 0 | 0 | 1 | 1 | 0 | 0 | 0 | 0 | 0 | 0 | 0 | 0 | 0 |
| KVG_26  | <i>Terebra guttata</i> | 2 | 1 | C | 25      | Kavieng, Papua New Guinea | 2 | 1 | 0 | 0 | 0 | 0 | 1 | 0 | 0 | 0 | 0 | 0 | 0 | 0 | 0 | 0 | 0 | 0 | 0 |
| KVG_108 | <i>Terebra guttata</i> | 2 | 1 | C | 32.315  | Kavieng, Papua New Guinea | 2 | 0 | 1 | 0 | 0 | 0 | 0 | 0 | 0 | 0 | 0 | 0 | 1 | 0 | 0 | 0 | 0 | 0 | 0 |
| KVG_260 | <i>Terebra guttata</i> | 2 | 1 | C | 55      | Kavieng, Papua New Guinea | 2 | 1 | 1 | 0 | 0 | 0 | 0 | 0 | 0 | 0 | 0 | 0 | 0 | 0 | 0 | 0 | 0 | 0 | 0 |
| KVG_256 | <i>Terebra guttata</i> | 2 | 1 | C | 90      | Kavieng, Papua New Guinea | 1 | 1 | 0 | 0 | 0 | 0 | 0 | 0 | 0 | 0 | 0 | 0 | 0 | 0 | 0 | 0 | 0 | 0 | 0 |
| KVG_66  | <i>Terebra guttata</i> | 2 | 1 | C | 171.048 | Kavieng, Papua New Guinea | 3 | 1 | 0 | 0 | 0 | 1 | 0 | 0 | 0 | 0 | 0 | 1 | 0 | 0 | 0 | 0 | 0 | 0 | 0 |
| KVG_249 | <i>Hastula hectica</i> | 2 | 1 | D | 60      | Kavieng, Papua New Guinea | 5 | 1 | 1 | 0 | 0 | 1 | 0 | 0 | 0 | 0 | 1 | 1 | 0 | 0 | 0 | 0 | 0 | 0 | 0 |
| KVG_253 | <i>Hastula hectica</i> | 2 | 1 | D | 60      | Kavieng, Papua New Guinea | 2 | 1 | 0 | 0 | 0 | 1 | 0 | 0 | 0 | 0 | 0 | 0 | 0 | 0 | 0 | 0 | 0 | 0 | 0 |
| KVG_58  | <i>Hastula hectica</i> | 2 | 1 | D | 60      | Kavieng, Papua New Guinea | 1 | 1 | 0 | 0 | 0 | 0 | 0 | 0 | 0 | 0 | 0 | 0 | 0 | 0 | 0 | 0 | 0 | 0 | 0 |
| KVG_110 | <i>Hastula hectica</i> | 2 | 1 | D | 60      | Kavieng, Papua New Guinea | 2 | 0 | 0 | 0 | 0 | 1 | 0 | 0 | 0 | 1 | 0 | 0 | 0 | 0 | 0 | 0 | 0 | 0 | 0 |

|         |                             |   |   |    |    |                                |   |   |   |   |   |   |   |   |   |   |   |   |   |   |   |   |   |   |   |
|---------|-----------------------------|---|---|----|----|--------------------------------|---|---|---|---|---|---|---|---|---|---|---|---|---|---|---|---|---|---|---|
|         |                             |   |   |    |    | Papua New Guinea               |   |   |   |   |   |   |   |   |   |   |   |   |   |   |   |   |   |   |   |
| KVG_54  | <i>Hastula hectica</i>      | 2 | 1 | D  | 60 | Kavieng, Papua New Guinea      | 2 | 1 | 0 | 0 | 0 | 0 | 0 | 0 | 0 | 0 | 0 | 0 | 0 | 0 | 0 | 0 | 0 | 0 |   |
| KVG_193 | <i>Hastula matheroniana</i> | 2 | 1 | D  | 30 | Kavieng, Papua New Guinea      | 2 | 1 | 1 | 0 | 0 | 0 | 0 | 0 | 0 | 0 | 0 | 0 | 0 | 0 | 0 | 0 | 0 | 0 |   |
| FJ_10   | <i>Partecosta nasoides</i>  | 1 | 0 | F2 | 7  | Fujairah, United Arab Emirates | 5 | 1 | 0 | 0 | 0 | 0 | 0 | 0 | 0 | 0 | 0 | 0 | 1 | 1 | 1 | 1 | 0 | 0 | 0 |
| FJ_15   | <i>Partecosta nasoides</i>  | 1 | 0 | F2 | 7  | Fujairah, United Arab Emirates | 2 | 1 | 0 | 0 | 0 | 1 | 0 | 0 | 0 | 0 | 0 | 0 | 0 | 0 | 0 | 0 | 0 | 0 | 0 |
| FJ_12   | <i>Partecosta nasoides</i>  | 1 | 0 | F2 | 8  | Fujairah, United Arab Emirates | 4 | 1 | 1 | 0 | 1 | 0 | 0 | 0 | 0 | 0 | 0 | 0 | 1 | 0 | 0 | 0 | 0 | 0 | 0 |
| FJ_13   | <i>Partecosta nasoides</i>  | 1 | 0 | F2 | 9  | Fujairah, United Arab Emirates | 4 | 1 | 0 | 0 | 0 | 1 | 0 | 0 | 0 | 0 | 0 | 0 | 1 | 0 | 0 | 0 | 1 | 0 | 0 |
| FJ_14   | <i>Partecosta nasoides</i>  | 1 | 0 | F2 | 9  | Fujairah, United Arab Emirates | 5 | 1 | 1 | 0 | 0 | 1 | 0 | 0 | 0 | 0 | 0 | 0 | 1 | 0 | 1 | 0 | 0 | 0 | 0 |
| FJ_11   | <i>Partecosta nasoides</i>  | 1 | 0 | F2 | 8  | Fujairah, United Arab Emirates | 4 | 1 | 0 | 0 | 0 | 1 | 0 | 0 | 0 | 1 | 0 | 0 | 0 | 0 | 1 | 0 | 0 | 0 | 0 |
| FJ_16   | <i>Partecosta nasoides</i>  | 1 | 0 | F2 | 8  | Fujairah, United Arab Emirates | 3 | 1 | 0 | 0 | 0 | 0 | 0 | 0 | 0 | 1 | 0 | 1 | 0 | 0 | 0 | 0 | 0 | 0 | 0 |
| KVG_127 | <i>Myurella nebulosa</i>    | 3 | 0 | E1 | 47 | Kavieng, Papua New Guinea      | 2 | 1 | 1 | 0 | 0 | 0 | 0 | 0 | 0 | 0 | 0 | 0 | 0 | 0 | 0 | 0 | 0 | 0 | 0 |

| Guinea  |                              |   |   |    |         |                           |   |   |   |   |   |   |   |   |   |   |   |   |   |   |   |   |   |   |   |
|---------|------------------------------|---|---|----|---------|---------------------------|---|---|---|---|---|---|---|---|---|---|---|---|---|---|---|---|---|---|---|
| KVG_50  | <i>Myurella nebulosa</i>     | 3 | 0 | E1 | 50      | Kavieng, Papua New Guinea | 2 | 1 | 0 | 0 | 0 | 1 | 0 | 0 | 0 | 0 | 0 | 0 | 0 | 0 | 0 | 0 | 0 | 0 | 0 |
| KVG_48  | <i>Myurella nebulosa</i>     | 3 | 0 | E1 | 84.381  | Kavieng, Papua New Guinea | 4 | 1 | 0 | 0 | 1 | 0 | 0 | 0 | 1 | 0 | 1 | 0 | 0 | 0 | 0 | 0 | 0 | 0 | 0 |
| KVG_176 | <i>Myurella nebulosa</i>     | 3 | 0 | E1 | 93.26   | Kavieng, Papua New Guinea | 1 | 0 | 0 | 0 | 0 | 0 | 0 | 0 | 1 | 0 | 0 | 0 | 0 | 0 | 0 | 0 | 0 | 0 | 0 |
| KVG_136 | <i>Punctoterebra roseata</i> | 3 | 0 | E2 | 25      | Kavieng, Papua New Guinea | 3 | 1 | 0 | 0 | 0 | 0 | 0 | 1 | 1 | 0 | 0 | 0 | 0 | 0 | 0 | 0 | 0 | 0 | 0 |
| KVG_137 | <i>Punctoterebra roseata</i> | 3 | 0 | E2 | 25      | Kavieng, Papua New Guinea | 4 | 1 | 1 | 0 | 0 | 1 | 0 | 0 | 1 | 0 | 0 | 0 | 0 | 0 | 0 | 0 | 0 | 0 | 0 |
| KVG_140 | <i>Punctoterebra roseata</i> | 3 | 0 | E2 | 25      | Kavieng, Papua New Guinea | 3 | 1 | 1 | 0 | 0 | 0 | 0 | 0 | 1 | 0 | 0 | 0 | 0 | 0 | 0 | 0 | 0 | 0 | 0 |
| KVG_138 | <i>Punctoterebra roseata</i> | 3 | 0 | E2 | 25      | Kavieng, Papua New Guinea | 4 | 1 | 1 | 0 | 0 | 0 | 0 | 0 | 1 | 1 | 0 | 0 | 0 | 0 | 0 | 0 | 0 | 0 | 0 |
| KVG_142 | <i>Punctoterebra roseata</i> | 3 | 0 | E2 | 25      | Kavieng, Papua New Guinea | 4 | 1 | 1 | 0 | 0 | 0 | 0 | 0 | 1 | 1 | 0 | 0 | 0 | 0 | 0 | 0 | 0 | 0 | 0 |
| KVG_139 | <i>Punctoterebra roseata</i> | 3 | 0 | E2 | 25      | Kavieng, Papua New Guinea | 3 | 1 | 1 | 0 | 0 | 0 | 0 | 0 | 0 | 0 | 0 | 0 | 0 | 0 | 0 | 0 | 0 | 0 | 1 |
| KVG_229 | <i>Terebra straminea</i>     | 2 | 1 | C  | 106.166 | Kavieng, Papua New Guinea | 2 | 1 | 0 | 0 | 0 | 1 | 0 | 0 | 0 | 0 | 0 | 0 | 0 | 0 | 0 | 0 | 0 | 0 | 0 |
| KVG_146 | <i>Terebra subulata</i>      | 2 | 1 | C  | 38      | Kavieng, Papua New Guinea | 2 | 1 | 0 | 0 | 0 | 1 | 0 | 0 | 0 | 0 | 0 | 0 | 0 | 0 | 0 | 0 | 0 | 0 | 0 |
| KVG_145 | <i>Terebra subulata</i>      | 2 | 1 | C  | 46      | Kavieng, Papua New Guinea | 1 | 1 | 0 | 0 | 0 | 0 | 0 | 0 | 0 | 0 | 0 | 0 | 0 | 0 | 0 | 0 | 0 | 0 | 0 |
| KVG_268 | <i>Terebra subulata</i>      | 2 | 1 | C  | 72.053  | Kavieng,                  | 2 | 1 | 0 | 1 | 0 | 0 | 0 | 0 | 0 | 0 | 0 | 0 | 0 | 0 | 0 | 0 | 0 | 0 | 0 |

|         |                              |   |   |    |         |                           |   |   |   |   |   |   |   |   |   |   |   |   |   |   |   |   |   |   |
|---------|------------------------------|---|---|----|---------|---------------------------|---|---|---|---|---|---|---|---|---|---|---|---|---|---|---|---|---|---|
|         |                              |   |   |    |         | Papua New Guinea          |   |   |   |   |   |   |   |   |   |   |   |   |   |   |   |   |   |   |
| KVG_144 | <i>Terebra subulata</i>      | 2 | 1 | C  | 102     | Kavieng, Papua New Guinea | 2 | 1 | 0 | 1 | 0 | 0 | 0 | 0 | 0 | 0 | 0 | 0 | 0 | 0 | 0 | 0 | 0 | 0 |
| KVG_47  | <i>Terebra subulata</i>      | 2 | 1 | C  | 182.209 | Kavieng, Papua New Guinea | 2 | 1 | 0 | 0 | 0 | 1 | 0 | 0 | 0 | 0 | 0 | 0 | 0 | 0 | 0 | 0 | 0 | 0 |
| KVG_46  | <i>Terebra subulata</i>      | 2 | 1 | C  | ?       | Kavieng, Papua New Guinea | 1 | 1 | 0 | 0 | 0 | 0 | 0 | 0 | 0 | 0 | 0 | 0 | 0 | 0 | 0 | 0 | 0 | 0 |
| KVG_92  | <i>Terebra subulata</i>      | 2 | 1 | C  | 50.71   | Kavieng, Papua New Guinea | 3 | 1 | 1 | 0 | 0 | 0 | 0 | 0 | 1 | 0 | 0 | 0 | 0 | 0 | 0 | 0 | 0 | 0 |
| KVG_156 | <i>Myurellopsis undulata</i> | 3 | 0 | E5 | 22      | Kavieng, Papua New Guinea | 3 | 1 | 1 | 0 | 0 | 1 | 0 | 0 | 0 | 0 | 0 | 0 | 0 | 0 | 0 | 0 | 0 | 0 |
| KVG_60  | <i>Myurellopsis undulata</i> | 3 | 0 | E5 | 60      | Kavieng, Papua New Guinea | 2 | 0 | 1 | 0 | 0 | 0 | 0 | 1 | 0 | 0 | 0 | 0 | 0 | 0 | 0 | 0 | 0 | 0 |
| KVG_105 | <i>Myurellopsis undulata</i> | 3 | 0 | E5 | 19      | Kavieng, Papua New Guinea | 7 | 1 | 1 | 1 | 1 | 0 | 0 | 0 | 1 | 1 | 0 | 0 | 1 | 0 | 0 | 0 | 0 | 0 |
| KVG_155 | <i>Myurellopsis undulata</i> | 3 | 0 | E5 | 30      | Kavieng, Papua New Guinea | 6 | 1 | 1 | 0 | 0 | 1 | 0 | 0 | 1 | 1 | 0 | 1 | 0 | 0 | 0 | 0 | 0 | 0 |
| KVG_5   | <i>Myurellopsis undulata</i> | 3 | 0 | E5 | 45.358  | Kavieng, Papua New Guinea | 3 | 0 | 1 | 0 | 0 | 1 | 0 | 0 | 0 | 1 | 0 | 0 | 0 | 0 | 0 | 0 | 0 | 0 |



**Table S2.** Prey sequences number, ID, and GenBank accession number. ID and voucher number of the terebrid from which it was isolated.

| Prey Sequence # | Prey Sequence ID           | Terebrid ID                  | Terebrid Voucher # | GenBank Accession Number |
|-----------------|----------------------------|------------------------------|--------------------|--------------------------|
| 15535_11242     | <i>Eusyllis</i>            | <i>Partecosta nassoides</i>  | FJ_10              | MW007415                 |
| 27741_18278     | <i>Heteropodarke</i>       | <i>Partecosta nassoides</i>  | FJ_10              | MW007416                 |
| 9150_27499      | <i>Odontosyllis</i>        | <i>Partecosta nassoides</i>  | FJ_10              | MW007417                 |
| 13263_27555     | <i>Odontosyllis</i>        | <i>Partecosta nassoides</i>  | FJ_10              | MW007418                 |
| 23034_23948     | <i>Scolecipis</i>          | <i>Partecosta nassoides</i>  | FJ_10              | MW007419                 |
| 7820_24829      | <i>Syllis</i>              | <i>Partecosta nassoides</i>  | FJ_10              | MW007420                 |
| 14802_6000      | <i>Eusyllis</i>            | <i>Partecosta nassoides</i>  | FJ_11              | MW007421                 |
| 7824_12340      | <i>Neanthes</i>            | <i>Partecosta nassoides</i>  | FJ_11              | MW007422                 |
| 24518_17679     | <i>Pseudopolydora</i>      | <i>Partecosta nassoides</i>  | FJ_11              | MW007423                 |
| 20557_11191     | <i>Scolecipis</i>          | <i>Partecosta nassoides</i>  | FJ_11              | MW007424                 |
| 17551_11858     | <i>Scolecipis</i>          | <i>Partecosta nassoides</i>  | FJ_11              | MW007425                 |
| 14778_2401      | <i>Odontosyllis</i>        | <i>Partecosta nassoides</i>  | FJ_12              | MW007426                 |
| 18320_11226     | <i>Polydora Dipolydora</i> | <i>Partecosta nassoides</i>  | FJ_12              | MW007427                 |
| 26839_22477     | <i>Scolecipis</i>          | <i>Partecosta nassoides</i>  | FJ_12              | MW007428                 |
| 27889_14521     | <i>Scolecipis</i>          | <i>Partecosta nassoides</i>  | FJ_12              | MW007429                 |
| 22811_11823     | <i>Scolecipis</i>          | <i>Partecosta nassoides</i>  | FJ_12              | MW007430                 |
| 18617_17154     | <i>Spio</i>                | <i>Partecosta nassoides</i>  | FJ_12              | MW007431                 |
| 6985_6145       | <i>Odontosyllis</i>        | <i>Partecosta nassoides</i>  | FJ_13              | MW007432                 |
| 12115_17716     | <i>Odontosyllis</i>        | <i>Partecosta nassoides</i>  | FJ_13              | MW007433                 |
| 24746_14609     | <i>Ophelia Notomastus</i>  | <i>Partecosta nassoides</i>  | FJ_13              | MW007434                 |
| 18185_8609      | <i>Pseudopolydora</i>      | <i>Partecosta nassoides</i>  | FJ_13              | MW007435                 |
| 20015_3213      | <i>Scolecipis</i>          | <i>Partecosta nassoides</i>  | FJ_13              | MW007436                 |
| 16398_11181     | <i>Odontosyllis</i>        | <i>Partecosta nassoides</i>  | FJ_14              | MW007437                 |
| 11877_26991     | <i>Eusyllis</i>            | <i>Partecosta nassoides</i>  | FJ_14              | MW007438                 |
| 12674_14511     | <i>Pseudopolydora</i>      | <i>Partecosta nassoides</i>  | FJ_14              | MW007439                 |
| 16144_16431     | <i>Scolecipis</i>          | <i>Partecosta nassoides</i>  | FJ_14              | MW007440                 |
| 20107_18305     | <i>Spio</i>                | <i>Partecosta nassoides</i>  | FJ_14              | MW007441                 |
| 14007_27289     | <i>Spio</i>                | <i>Partecosta nassoides</i>  | FJ_14              | MW007442                 |
| 15317_22380     | <i>Pseudopolydora</i>      | <i>Partecosta nassoides</i>  | FJ_15              | MW007443                 |
| 5803_18923      | <i>Scolecipis</i>          | <i>Partecosta nassoides</i>  | FJ_15              | MW007444                 |
| 25615_9879      | <i>Scolecipis</i>          | <i>Partecosta nassoides</i>  | FJ_15              | MW007445                 |
| 18264_135       | <i>Haplosyllis</i>         | <i>Partecosta nassoides</i>  | FJ_16              | MW007446                 |
| 18848_117       | <i>Neanthes</i>            | <i>Partecosta nassoides</i>  | FJ_16              | MW007447                 |
| 28680_20547     | <i>Scolecipis</i>          | <i>Partecosta nassoides</i>  | FJ_16              | MW007448                 |
| 19594_17270     | <i>Poecilochaetus</i>      | <i>Myurella affinis</i>      | KVG_103            | MW007449                 |
| 23950_23805     | <i>Pseudopolydora</i>      | <i>Myurella affinis</i>      | KVG_103            | MW007450                 |
| 9593_5822       | <i>Scolecipis</i>          | <i>Myurella affinis</i>      | KVG_103            | MW007451                 |
| 14898_25186     | <i>Scolecipis</i>          | <i>Myurella affinis</i>      | KVG_103            | MW007452                 |
| 19111_2419      | <i>Malacoceros</i>         | <i>Myurellopsis undulata</i> | KVG_105            | MW007453                 |
| 18144_16156     | <i>Neanthes</i>            | <i>Myurellopsis undulata</i> | KVG_105            | MW007454                 |
| 13901_18332     | <i>Odontosyllis</i>        | <i>Myurellopsis undulata</i> | KVG_105            | MW007455                 |
| 2470_12396      | <i>Poecilochaetus</i>      | <i>Myurellopsis undulata</i> | KVG_105            | MW007456                 |
| 23663_18659     | <i>Polydora Dipolydora</i> | <i>Myurellopsis undulata</i> | KVG_105            | MW007457                 |
| 15354_6474      | <i>Scolecipis</i>          | <i>Myurellopsis undulata</i> | KVG_105            | MW007458                 |
| 17650_19004     | <i>Spio</i>                | <i>Myurellopsis undulata</i> | KVG_105            | MW007459                 |
| 8684_18404      | <i>Spio</i>                | <i>Myurellopsis undulata</i> | KVG_105            | MW007460                 |

|             |                       |                              |         |          |
|-------------|-----------------------|------------------------------|---------|----------|
| 23854_18844 | <i>Odontosyllis</i>   | <i>Terebra guttata</i>       | KVG_108 | MW007461 |
| 16882_8371  | <i>Spio</i>           | <i>Terebra guttata</i>       | KVG_108 | MW007462 |
| 26156_6985  | <i>Neanthes</i>       | <i>Hastula hectica</i>       | KVG_110 | MW007463 |
| 20691_12826 | <i>Pseudopolydora</i> | <i>Hastula hectica</i>       | KVG_110 | MW007464 |
| 22470_17554 | <i>Neanthes</i>       | <i>Oxymeris felina</i>       | KVG_112 | MW007465 |
| 28004_19868 | <i>Poecilochaetus</i> | <i>Oxymeris felina</i>       | KVG_112 | MW007466 |
| 14055_2817  | <i>Scolelepis</i>     | <i>Oxymeris felina</i>       | KVG_112 | MW007467 |
| 1865_14120  | <i>Spio</i>           | <i>Oxymeris felina</i>       | KVG_112 | MW007468 |
| 23689_26364 | <i>Scolelepis</i>     | <i>Oxymeris felina</i>       | KVG_113 | MW007469 |
| 11753_22594 | <i>Odontosyllis</i>   | <i>Oxymeris felina</i>       | KVG_113 | MW007470 |
| 7142_21217  | <i>Odontosyllis</i>   | <i>Oxymeris felina</i>       | KVG_113 | MW007471 |
| 8032_7103   | <i>Poecilochaetus</i> | <i>Oxymeris felina</i>       | KVG_113 | MW007472 |
| 26929_16407 | <i>Pseudopolydora</i> | <i>Oxymeris felina</i>       | KVG_113 | MW007473 |
| 11416_3306  | <i>Spio</i>           | <i>Oxymeris felina</i>       | KVG_113 | MW007474 |
| 16407_4906  | <i>Neanthes</i>       | <i>Oxymeris felina</i>       | KVG_114 | MW007475 |
| 16630_21377 | <i>Poecilochaetus</i> | <i>Oxymeris felina</i>       | KVG_114 | MW007476 |
| 7221_4774   | <i>Scolelepis</i>     | <i>Oxymeris felina</i>       | KVG_114 | MW007477 |
| 26308_16440 | <i>Spio</i>           | <i>Oxymeris felina</i>       | KVG_114 | MW007478 |
| 22628_22760 | <i>Scolelepis</i>     | <i>Myurella nebulosa</i>     | KVG_127 | MW007479 |
| 27330_14803 | <i>Scolelepis</i>     | <i>Myurella nebulosa</i>     | KVG_127 | MW007480 |
| 5691_23032  | <i>Spio</i>           | <i>Myurella nebulosa</i>     | KVG_127 | MW007481 |
| 9176_25384  | <i>Scolelepis</i>     | <i>Terebra argus</i>         | KVG_129 | MW007482 |
| 18419_28469 | <i>Spio</i>           | <i>Terebra argus</i>         | KVG_129 | MW007483 |
| 26460_20014 | <i>Magelona</i>       | <i>Punctoterebra roseata</i> | KVG_136 | MW007484 |
| 19939_25342 | <i>Poecilochaetus</i> | <i>Punctoterebra roseata</i> | KVG_136 | MW007485 |
| 8247_8407   | <i>Scolelepis</i>     | <i>Punctoterebra roseata</i> | KVG_136 | MW007486 |
| 6542_5183   | <i>Scolelepis</i>     | <i>Punctoterebra roseata</i> | KVG_137 | MW007487 |
| 12255_4418  | <i>Poecilochaetus</i> | <i>Punctoterebra roseata</i> | KVG_137 | MW007488 |
| 8270_18053  | <i>Pseudopolydora</i> | <i>Punctoterebra roseata</i> | KVG_137 | MW007489 |
| 28847_10744 | <i>Scolelepis</i>     | <i>Punctoterebra roseata</i> | KVG_137 | MW007490 |
| 4916_16212  | <i>Scolelepis</i>     | <i>Punctoterebra roseata</i> | KVG_137 | MW007491 |
| 13894_25373 | <i>Spio</i>           | <i>Punctoterebra roseata</i> | KVG_137 | MW007492 |
| 16237_20640 | <i>Spio</i>           | <i>Punctoterebra roseata</i> | KVG_137 | MW007493 |
| 5634_9564   | <i>Neanthes</i>       | <i>Punctoterebra roseata</i> | KVG_138 | MW007494 |
| 23363_20092 | <i>Poecilochaetus</i> | <i>Punctoterebra roseata</i> | KVG_138 | MW007495 |
| 18559_28088 | <i>Scolelepis</i>     | <i>Punctoterebra roseata</i> | KVG_138 | MW007496 |
| 22221_6388  | <i>Scolelepis</i>     | <i>Punctoterebra roseata</i> | KVG_138 | MW007497 |
| 23351_20524 | <i>Scolelepis</i>     | <i>Punctoterebra roseata</i> | KVG_138 | MW007498 |
| 22818_7965  | <i>Spio</i>           | <i>Punctoterebra roseata</i> | KVG_138 | MW007499 |
| 26407_18192 | <i>Scolelepis</i>     | <i>Punctoterebra roseata</i> | KVG_139 | MW007500 |
| 11040_16772 | <i>Sipunculus</i>     | <i>Punctoterebra roseata</i> | KVG_139 | MW007501 |
| 22876_26268 | <i>Spio</i>           | <i>Punctoterebra roseata</i> | KVG_139 | MW007502 |
| 13614_12805 | <i>Poecilochaetus</i> | <i>Punctoterebra roseata</i> | KVG_140 | MW007503 |
| 4051_13103  | <i>Scolelepis</i>     | <i>Punctoterebra roseata</i> | KVG_140 | MW007504 |
| 7509_4516   | <i>Scolelepis</i>     | <i>Punctoterebra roseata</i> | KVG_140 | MW007505 |
| 4449_9589   | <i>Spio</i>           | <i>Punctoterebra roseata</i> | KVG_140 | MW007506 |
| 24206_16262 | <i>Neanthes</i>       | <i>Punctoterebra roseata</i> | KVG_142 | MW007507 |
| 27522_17392 | <i>Poecilochaetus</i> | <i>Punctoterebra roseata</i> | KVG_142 | MW007508 |
| 9030_16446  | <i>Scolelepis</i>     | <i>Punctoterebra roseata</i> | KVG_142 | MW007509 |
| 15139_9023  | <i>Spio</i>           | <i>Punctoterebra roseata</i> | KVG_142 | MW007510 |
| 7293_4536   | <i>Spio</i>           | <i>Punctoterebra roseata</i> | KVG_142 | MW007511 |

|             |                            |                              |         |          |
|-------------|----------------------------|------------------------------|---------|----------|
| 17046_9851  | <i>Spio</i>                | <i>Punctoterebra roseata</i> | KVG_142 | MW007512 |
| 24701_6478  | <i>Malacoceros</i>         | <i>Terebra subulata</i>      | KVG_144 | MW007513 |
| 14975_22281 | <i>Scolecipis</i>          | <i>Terebra subulata</i>      | KVG_144 | MW007514 |
| 23987_22102 | <i>Scolecipis</i>          | <i>Terebra subulata</i>      | KVG_144 | MW007515 |
| 19169_3050  | <i>Scolecipis</i>          | <i>Terebra subulata</i>      | KVG_144 | MW007516 |
| 27440_10843 | <i>Scolecipis</i>          | <i>Terebra subulata</i>      | KVG_145 | MW007517 |
| 8290_19193  | <i>Pseudopolydora</i>      | <i>Terebra subulata</i>      | KVG_146 | MW007518 |
| 12602_26516 | <i>Scolecipis</i>          | <i>Terebra subulata</i>      | KVG_146 | MW007519 |
| 12265_17512 | <i>Scolecipis</i>          | <i>Terebra subulata</i>      | KVG_146 | MW007520 |
| 21945_21465 | <i>Haplosyllis</i>         | <i>Myurellopsis undulata</i> | KVG_155 | MW007521 |
| 13998_13312 | <i>Neanthes</i>            | <i>Myurellopsis undulata</i> | KVG_155 | MW007522 |
| 28428_18875 | <i>Poecilochaetus</i>      | <i>Myurellopsis undulata</i> | KVG_155 | MW007523 |
| 28203_10583 | <i>Pseudopolydora</i>      | <i>Myurellopsis undulata</i> | KVG_155 | MW007524 |
| 5897_16222  | <i>Scolecipis</i>          | <i>Myurellopsis undulata</i> | KVG_155 | MW007525 |
| 26672_13907 | <i>Scolecipis</i>          | <i>Myurellopsis undulata</i> | KVG_155 | MW007526 |
| 11820_5426  | <i>Spio</i>                | <i>Myurellopsis undulata</i> | KVG_155 | MW007527 |
| 5410_19212  | <i>Pseudopolydora</i>      | <i>Myurellopsis undulata</i> | KVG_156 | MW007528 |
| 23231_5405  | <i>Scolecipis</i>          | <i>Myurellopsis undulata</i> | KVG_156 | MW007529 |
| 23530_17809 | <i>Spio</i>                | <i>Myurellopsis undulata</i> | KVG_156 | MW007530 |
| 14858_26879 | <i>Spio</i>                | <i>Myurellopsis undulata</i> | KVG_156 | MW007531 |
| 26146_16593 | <i>Haplosyllis</i>         | <i>Myurella amoena</i>       | KVG_159 | MW007532 |
| 21635_16635 | <i>Neanthes</i>            | <i>Myurella amoena</i>       | KVG_159 | MW007533 |
| 14466_12124 | <i>Pseudopolydora</i>      | <i>Myurella amoena</i>       | KVG_159 | MW007534 |
| 15513_15064 | <i>Scolecipis</i>          | <i>Myurella amoena</i>       | KVG_159 | MW007535 |
| 8116_19971  | <i>Spio</i>                | <i>Myurella amoena</i>       | KVG_159 | MW007536 |
| 10842_8049  | <i>Spio</i>                | <i>Myurella amoena</i>       | KVG_159 | MW007537 |
| 11319_18350 | <i>Neanthes</i>            | <i>Myurella nebulosa</i>     | KVG_176 | MW007538 |
| 12601_2768  | <i>Neanthes</i>            | <i>Oxymeris areolata</i>     | KVG_190 | MW007539 |
| 5746_13549  | <i>Poecilochaetus</i>      | <i>Oxymeris areolata</i>     | KVG_190 | MW007540 |
| 2342_17037  | <i>Polydora_Dipolydora</i> | <i>Oxymeris areolata</i>     | KVG_190 | MW007541 |
| 17797_8733  | <i>Scolecipis</i>          | <i>Hastula matheroniana</i>  | KVG_193 | MW007542 |
| 12238_16883 | <i>Spio</i>                | <i>Hastula matheroniana</i>  | KVG_193 | MW007543 |
| 18533_15435 | <i>Neanthes</i>            | <i>Hastula acumen</i>        | KVG_198 | MW007544 |
| 26751_17717 | <i>Pseudopolydora</i>      | <i>Hastula acumen</i>        | KVG_198 | MW007545 |
| 17643_25322 | <i>Scolecipis</i>          | <i>Hastula acumen</i>        | KVG_198 | MW007546 |
| 4009_20186  | <i>Scolecipis</i>          | <i>Hastula acumen</i>        | KVG_198 | MW007547 |
| 12388_18081 | <i>Neanthes</i>            | <i>Myurella amoena</i>       | KVG_2   | MW007548 |
| 9149_19714  | <i>Poecilochaetus</i>      | <i>Myurella amoena</i>       | KVG_2   | MW007549 |
| 6139_6634   | <i>Scolecipis</i>          | <i>Myurella amoena</i>       | KVG_2   | MW007550 |
| 4247_17779  | <i>Spio</i>                | <i>Myurella amoena</i>       | KVG_2   | MW007551 |
| 3393_16130  | <i>Travisia_Ophelina</i>   | <i>Myurella amoena</i>       | KVG_2   | MW007552 |
| 14320_6391  | <i>Odontosyllis</i>        | <i>Hastula acumen</i>        | KVG_201 | MW007553 |
| 13805_6516  | <i>Pseudopolydora</i>      | <i>Hastula acumen</i>        | KVG_201 | MW007554 |
| 10324_5551  | <i>Scolecipis</i>          | <i>Hastula acumen</i>        | KVG_201 | MW007555 |
| 19276_17234 | <i>Scolecipis</i>          | <i>Hastula acumen</i>        | KVG_201 | MW007556 |
| 25275_6824  | <i>Odontosyllis</i>        | <i>Hastula acumen</i>        | KVG_203 | MW007557 |
| 7246_13919  | <i>Odontosyllis</i>        | <i>Hastula acumen</i>        | KVG_203 | MW007558 |
| 26670_14670 | <i>Pseudopolydora</i>      | <i>Hastula acumen</i>        | KVG_203 | MW007559 |
| 20298_3603  | <i>Scolecipis</i>          | <i>Hastula acumen</i>        | KVG_203 | MW007560 |
| 16589_25836 | <i>Spio</i>                | <i>Hastula acumen</i>        | KVG_203 | MW007561 |
| 8902_17154  | <i>Malacoceros</i>         | <i>Oxymeris felina</i>       | KVG_211 | MW007562 |

|             |                            |                          |         |          |
|-------------|----------------------------|--------------------------|---------|----------|
| 19603_24900 | <i>Odontosyllis</i>        | <i>Oxymeris felina</i>   | KVG_211 | MW007563 |
| 6477_23447  | <i>Poecilochaetus</i>      | <i>Oxymeris felina</i>   | KVG_211 | MW007564 |
| 23390_20095 | <i>Scolecipis</i>          | <i>Oxymeris felina</i>   | KVG_211 | MW007565 |
| 9089_11444  | <i>Spio</i>                | <i>Oxymeris felina</i>   | KVG_211 | MW007566 |
| 8430_6512   | <i>Spio</i>                | <i>Oxymeris felina</i>   | KVG_211 | MW007567 |
| 19676_19282 | <i>Odontosyllis</i>        | <i>Myurella affinis</i>  | KVG_214 | MW007568 |
| 11262_12156 | <i>Ophelia_Notomastus</i>  | <i>Myurella affinis</i>  | KVG_214 | MW007569 |
| 11065_20081 | <i>Platynereis</i>         | <i>Myurella affinis</i>  | KVG_214 | MW007570 |
| 21477_22747 | <i>Polydora_Dipolydora</i> | <i>Myurella affinis</i>  | KVG_214 | MW007571 |
| 9817_13756  | <i>Pseudopolydora</i>      | <i>Myurella affinis</i>  | KVG_215 | MW007572 |
| 23181_6333  | <i>Scolecipis</i>          | <i>Myurella affinis</i>  | KVG_215 | MW007573 |
| 28009_13589 | <i>Scolecipis</i>          | <i>Terebra straminea</i> | KVG_229 | MW007574 |
| 23183_21366 | <i>Pseudopolydora</i>      | <i>Terebra straminea</i> | KVG_229 | MW007575 |
| 18701_3053  | <i>Scolecipis</i>          | <i>Terebra straminea</i> | KVG_229 | MW007576 |
| 14816_11458 | <i>Pseudopolydora</i>      | <i>Hastula albula</i>    | KVG_234 | MW007577 |
| 3995_11379  | <i>Travisia_Ophelina</i>   | <i>Hastula albula</i>    | KVG_234 | MW007578 |
| 10383_14630 | <i>Platynereis</i>         | <i>Hastula acumen</i>    | KVG_236 | MW007579 |
| 17002_14609 | <i>Polydora_Dipolydora</i> | <i>Hastula acumen</i>    | KVG_236 | MW007580 |
| 16408_5047  | <i>Scolecipis</i>          | <i>Hastula acumen</i>    | KVG_236 | MW007581 |
| 4846_7976   | <i>Spio</i>                | <i>Hastula acumen</i>    | KVG_236 | MW007582 |
| 23010_17896 | <i>Scolecipis</i>          | <i>Hastula acumen</i>    | KVG_242 | MW007583 |
| 19307_12483 | <i>Scolecipis</i>          | <i>Hastula acumen</i>    | KVG_242 | MW007584 |
| 19176_2181  | <i>Pseudopolydora</i>      | <i>Hastula acumen</i>    | KVG_243 | MW007585 |
| 24823_18358 | <i>Scolecipis</i>          | <i>Hastula acumen</i>    | KVG_243 | MW007586 |
| 16033_6921  | <i>Scolecipis</i>          | <i>Oxymeris areolata</i> | KVG_247 | MW007587 |
| 16236_23478 | <i>Haplosyllis</i>         | <i>Hastula hectica</i>   | KVG_249 | MW007588 |
| 23562_13630 | <i>Platynereis</i>         | <i>Hastula hectica</i>   | KVG_249 | MW007589 |
| 4501_14850  | <i>Pseudopolydora</i>      | <i>Hastula hectica</i>   | KVG_249 | MW007590 |
| 23099_5976  | <i>Scolecipis</i>          | <i>Hastula hectica</i>   | KVG_249 | MW007591 |
| 14318_9216  | <i>Scolecipis</i>          | <i>Hastula hectica</i>   | KVG_249 | MW007592 |
| 8508_19939  | <i>Spio</i>                | <i>Hastula hectica</i>   | KVG_249 | MW007593 |
| 27874_22269 | <i>Pseudopolydora</i>      | <i>Hastula hectica</i>   | KVG_253 | MW007594 |
| 26823_19500 | <i>Scolecipis</i>          | <i>Hastula hectica</i>   | KVG_253 | MW007595 |
| 18567_14060 | <i>Scolecipis</i>          | <i>Terebra guttata</i>   | KVG_256 | MW007596 |
| 16952_5608  | <i>Scolecipis</i>          | <i>Terebra guttata</i>   | KVG_256 | MW007597 |
| 7949_19305  | <i>Pygospio</i>            | <i>Terebra guttata</i>   | KVG_26  | MW007598 |
| 3132_17052  | <i>Scolecipis</i>          | <i>Terebra guttata</i>   | KVG_26  | MW007599 |
| 9529_10330  | <i>Scolecipis</i>          | <i>Terebra guttata</i>   | KVG_260 | MW007600 |
| 23383_20329 | <i>Spio</i>                | <i>Terebra guttata</i>   | KVG_260 | MW007601 |
| 15102_7470  | <i>Pseudopolydora</i>      | <i>Terebra argus</i>     | KVG_265 | MW007602 |
| 2742_14021  | <i>Scolecipis</i>          | <i>Terebra argus</i>     | KVG_265 | MW007603 |
| 29553_15227 | <i>Malacoceros</i>         | <i>Terebra subulata</i>  | KVG_268 | MW007604 |
| 11548_8644  | <i>Scolecipis</i>          | <i>Terebra subulata</i>  | KVG_268 | MW007605 |
| 12299_9333  | <i>Scolecipis</i>          | <i>Oxymeris areolata</i> | KVG_41  | MW007606 |
| 5817_7142   | <i>Scolecipis</i>          | <i>Terebra subulata</i>  | KVG_46  | MW007607 |
| 21614_5002  | <i>Pseudopolydora</i>      | <i>Terebra subulata</i>  | KVG_47  | MW007608 |
| 23673_26468 | <i>Scolecipis</i>          | <i>Terebra subulata</i>  | KVG_47  | MW007609 |
| 19429_14576 | <i>Haplosyllis</i>         | <i>Myurella nebulosa</i> | KVG_48  | MW007610 |
| 1921_15447  | <i>Neanthes</i>            | <i>Myurella nebulosa</i> | KVG_48  | MW007611 |
| 22445_4691  | <i>Polydora_Dipolydora</i> | <i>Myurella nebulosa</i> | KVG_48  | MW007612 |
| 7462_26393  | <i>Scolecipis</i>          | <i>Myurella nebulosa</i> | KVG_48  | MW007613 |

|             |                            |                              |         |          |
|-------------|----------------------------|------------------------------|---------|----------|
| 15140_19854 | <i>Neanthes</i>            | <i>Myurellopsis undulata</i> | KVG_5   | MW007614 |
| 26066_19002 | <i>Pseudopolydora</i>      | <i>Myurellopsis undulata</i> | KVG_5   | MW007615 |
| 27042_18130 | <i>Spio</i>                | <i>Myurellopsis undulata</i> | KVG_5   | MW007616 |
| 15176_13362 | <i>Pseudopolydora</i>      | <i>Myurella nebulosa</i>     | KVG_50  | MW007617 |
| 11713_14876 | <i>Scolecipis</i>          | <i>Myurella nebulosa</i>     | KVG_50  | MW007618 |
| 13384_19770 | <i>Ophelia Notomastus</i>  | <i>Myurella amoena</i>       | KVG_53  | MW007619 |
| 12303_28041 | <i>Poecilochaetus</i>      | <i>Myurella amoena</i>       | KVG_53  | MW007620 |
| 21756_20025 | <i>Scolecipis</i>          | <i>Myurella amoena</i>       | KVG_53  | MW007621 |
| 1883_17254  | <i>Scolecipis</i>          | <i>Myurella amoena</i>       | KVG_53  | MW007622 |
| 2597_11868  | <i>Spio</i>                | <i>Myurella amoena</i>       | KVG_53  | MW007623 |
| 8463_4508   | <i>Neanthes</i>            | <i>Hastula hectica</i>       | KVG_54  | MW007624 |
| 27590_19857 | <i>Scolecipis</i>          | <i>Hastula hectica</i>       | KVG_54  | MW007625 |
| 18834_10600 | <i>Scolecipis</i>          | <i>Hastula hectica</i>       | KVG_58  | MW007626 |
| 21152_26920 | <i>Poecilochaetus</i>      | <i>Myurellopsis undulata</i> | KVG_60  | MW007627 |
| 9682_3840   | <i>Spio</i>                | <i>Myurellopsis undulata</i> | KVG_60  | MW007628 |
| 24583_6310  | <i>Haplosyllis</i>         | <i>Terebra guttata</i>       | KVG_66  | MW007629 |
| 22033_16326 | <i>Pseudopolydora</i>      | <i>Terebra guttata</i>       | KVG_66  | MW007630 |
| 13402_5805  | <i>Scolecipis</i>          | <i>Terebra guttata</i>       | KVG_66  | MW007631 |
| 9793_23573  | <i>Neanthes</i>            | <i>Terebra argus</i>         | KVG_84  | MW007632 |
| 6340_16207  | <i>Poecilochaetus</i>      | <i>Terebra argus</i>         | KVG_84  | MW007633 |
| 25735_22851 | <i>Polydora Dipolydora</i> | <i>Terebra argus</i>         | KVG_84  | MW007634 |
| 23404_12340 | <i>Scolecipis</i>          | <i>Terebra argus</i>         | KVG_84  | MW007635 |
| 28220_13266 | <i>Spio</i>                | <i>Terebra argus</i>         | KVG_84  | MW007636 |
| 11307_21693 | <i>Spio</i>                | <i>Terebra argus</i>         | KVG_84  | MW007637 |
| 8732_10972  | <i>Spio</i>                | <i>Terebra argus</i>         | KVG_84  | MW007638 |
| 5405_7597   | <i>Pseudopolydora</i>      | <i>Myurella affinis</i>      | KVG_90  | MW007639 |
| 11393_28576 | <i>Scolecipis</i>          | <i>Myurella affinis</i>      | KVG_90  | MW007640 |
| 24416_25390 | <i>Neanthes</i>            | <i>Terebra subulata</i>      | KVG_92  | MW007641 |
| 12583_12537 | <i>Scolecipis</i>          | <i>Terebra subulata</i>      | KVG_92  | MW007642 |
| 5302_23341  | <i>Spio</i>                | <i>Terebra subulata</i>      | KVG_92  | MW007643 |
| 24684_21551 | <i>Haplosyllis</i>         | <i>Myurella affinis</i>      | KVG_97  | MW007644 |
| 26680_21334 | <i>Neanthes</i>            | <i>Myurella affinis</i>      | KVG_97  | MW007645 |
| 14657_10199 | <i>Ophelia Notomastus</i>  | <i>Myurella affinis</i>      | KVG_97  | MW007646 |
| 15757_27301 | <i>Scolecipis</i>          | <i>Myurella affinis</i>      | KVG_97  | MW007647 |
| 15250_3151  | <i>Poecilochaetus</i>      | <i>Terebra argus</i>         | KVG_XX  | MW007648 |
| 2239_12193  | <i>Pseudopolydora</i>      | <i>Terebra argus</i>         | KVG_XX  | MW007649 |
| 8198_12470  | <i>Scolecipis</i>          | <i>Terebra argus</i>         | KVG_XX  | MW007650 |
| 11467_2585  | <i>Spio</i>                | <i>Terebra argus</i>         | KVG_XX  | MW007651 |
| 16928_19265 | <i>Poecilochaetus</i>      | <i>Neoterebra dislocata</i>  | Tamp_17 | MW007652 |
| 15215_15537 | <i>Scolecipis</i>          | <i>Neoterebra dislocata</i>  | Tamp_17 | MW007653 |
| 11905_7897  | <i>Spio</i>                | <i>Neoterebra dislocata</i>  | Tamp_17 | MW007654 |
| 7458_6196   | <i>Spio</i>                | <i>Neoterebra dislocata</i>  | Tamp_17 | MW007655 |
| 19488_4690  | <i>Haplosyllis</i>         | <i>Neoterebra dislocata</i>  | Tamp_18 | MW007656 |
| 12507_28538 | <i>Polydora Dipolydora</i> | <i>Neoterebra dislocata</i>  | Tamp_18 | MW007657 |
| 15046_21361 | <i>Scolecipis</i>          | <i>Neoterebra dislocata</i>  | Tamp_18 | MW007658 |
| 5210_19368  | <i>Spio</i>                | <i>Neoterebra dislocata</i>  | Tamp_18 | MW007659 |
| 11238_14931 | <i>Neanthes</i>            | <i>Neoterebra dislocata</i>  | Tamp_50 | MW007660 |
| 10609_20576 | <i>Poecilochaetus</i>      | <i>Neoterebra dislocata</i>  | Tamp_50 | MW007661 |
| 20223_8654  | <i>Pseudopolydora</i>      | <i>Neoterebra dislocata</i>  | Tamp_50 | MW007662 |
| 7408_23902  | <i>Scolecipis</i>          | <i>Neoterebra dislocata</i>  | Tamp_50 | MW007663 |
| 22892_17291 | <i>Spio</i>                | <i>Neoterebra dislocata</i>  | Tamp_50 | MW007664 |

---

|             |                       |                             |         |          |
|-------------|-----------------------|-----------------------------|---------|----------|
| 11731_11525 | <i>Odontosyllis</i>   | <i>Neoterebra dislocata</i> | Tamp_63 | MW007665 |
| 13896_16114 | <i>Poecilochaetus</i> | <i>Neoterebra dislocata</i> | Tamp_63 | MW007666 |
| 29256_15611 | <i>Scolelepis</i>     | <i>Neoterebra dislocata</i> | Tamp_63 | MW007667 |
| 26665_23868 | <i>Spio</i>           | <i>Neoterebra dislocata</i> | Tamp_63 | MW007668 |

---
